# Supplementary material
Source: PubMed Central journal article supplement (PMC9359742)
Supplement: can-21-0622_supp.pdf [file can-21-0622_supp.pdf]

## Targeting LRRC15 inhibits metastatic dissemination of ovarian cancer

Upasana Ray <sup>1\*</sup>, Deok-Beom Jung <sup>1,2\*</sup>, Ling Jin <sup>1</sup>, Yinan Xiao <sup>1</sup>, Subramanyam Dasari <sup>3</sup>, Sayantani Sarkar Bhattacharya <sup>1</sup>, Prabhu Thirusangu <sup>1</sup>, Julie K. Staub <sup>1</sup>, Debarshi Roy <sup>1,4</sup>, Bhaskar Roy<sup>5</sup>, S. John Weroha<sup>6</sup>, Xiaonan Hou <sup>6</sup>, James W. Purcell<sup>7</sup>, Jamie N. Bakkum-Gamez<sup>8</sup>, Scott H. Kaufmann<sup>9</sup>, Nagarajan Kannan<sup>10</sup>, Anirban K. Mitra <sup>3\*\*</sup> and Viji Shridhar <sup>1\*\*</sup>

<sup>1</sup>Department of Experimental Pathology and Medicine, Mayo Clinic, Rochester, MN, USA

<sup>2</sup> ASAN Biomedical Research Center, Seoul, S. Korea

<sup>3</sup>Department of Medical and Molecular Genetics, Indiana University School of Medicine, Indianapolis, IN, USA

<sup>4</sup>Alcorn State University, Lorman, MS, USA

<sup>5</sup>Division of Gastroenterology and Hepatology, Mayo Clinic, Rochester, MN, USA

<sup>6</sup>Department of Oncology, Mayo Clinic, Rochester, MN, USA

<sup>7</sup>Department of Oncology Drug Discovery, AbbVie, South San Francisco, CA, USA

<sup>8</sup>Division of Obstetrics and Gynecology, Mayo Clinic, Rochester, MN, USA

<sup>9</sup>Division of Molecular Pharmacology and Experimental Therapeutics, Mayo Clinic, Rochester, MN, USA

<sup>10</sup>Division of Experimental Pathology, Center for Regenerative Medicine, Mayo Clinic, Rochester, MN, USA

\* Both authors contributed equally.

\*\*Correspondence and requests for materials should be addressed to V.S. (email: [shridhar.vijayalakshmi@mayo.edu](mailto:shridhar.vijayalakshmi@mayo.edu))

Running title: LRRC15 is a novel promoter of ovarian cancer metastasis

Table S1

| <b>Antibodies</b>                                                                | <b>Company</b>                              | <b>Catalog No.</b>                                  | <b>Ab Dilutions</b>      |
|----------------------------------------------------------------------------------|---------------------------------------------|-----------------------------------------------------|--------------------------|
| 1. Cleaved PARP1                                                                 | Cell Signaling Technology, Danvers, MA      | cst5625                                             | WB- 1:2000               |
| 2. LRRC15                                                                        | Abcam, MA, U.S.A<br>AbbVie, CA, USA         | ab150376                                            | WB- 1:2000<br>IHC- 1:500 |
| 3. PCNA                                                                          | Santa Cruz Biotechnology, Texas, U.S.A      | sc9857                                              | WB- 1:1000               |
| 4. ITGB1                                                                         | R&D                                         | AF1778-SP                                           | WB- 1:1000<br>IF- 1:100  |
| 5. $\beta$ -actin                                                                | Gene Tex                                    | GTX629630                                           | WB- 1:1000               |
| 6. Cleaved caspase 3                                                             | Cell Signaling Technology, Danvers, MA      | cst9664                                             | WB- 1:2000               |
| 7. Ki67                                                                          | Cell signaling Technology, Danvers, MA      | cst9027                                             | IHC- 1:100               |
| 8. GAPDH                                                                         | Santa Cruz Biotechnology, Texas, U.S.A      | sc-47724                                            | WB- 1:1000               |
| 9. phospho-FAK Tyr397                                                            | Cell signaling Technology, Danvers, MA      | cst8556                                             | WB- 1:2000               |
| 10. FAK                                                                          | Cell signaling Technology, Danvers, MA      | cst3285                                             | WB- 1:2000               |
| 11. Human epithelial specific antigen                                            | Chemicon International, Temecula, CA, U.S.A | CBL251                                              | IF- 1:100                |
| 12. Fibroblast activated protein                                                 | R&D Systems, Inc., MN, U.S.A                | AF3715                                              | IF- 1:100                |
| 13. Phalloidin-iFluor 488 Reagent                                                | Abcam, MA, U.S.A                            | ab176753                                            | IF- 1:500                |
| 14. Vinculin                                                                     | Proteintech, IL, U.S.A                      | 26520-1-AP                                          | IF- 1:500                |
|                                                                                  |                                             |                                                     |                          |
| <b>Reagents</b>                                                                  | <b>Company</b>                              | <b>Catalog No.</b>                                  |                          |
| 1. CellTracker <sup>TM</sup> green (CMFDA)                                       | ThermoFisher Scientific                     | C2925                                               |                          |
| 2. Fibronectin                                                                   | Millipore                                   | FC010                                               |                          |
| 3. Poly-L-Lysine,<br>4. Collagen 1A1,<br>5. Laminin,<br>6. Vitronectin           | Sigma-Aldrich                               | P4707,<br>C8919,<br>L2020,<br>V8379                 |                          |
| 7. 3-(4,5-dimethylthiazol-2-yl)-2,5-diphenyltetrazolium bromide (MTT)            | ThermoFisher Scientific                     | M6494                                               |                          |
| 8. Antifade mounting medium with DAPI                                            | Vectashield, Burlingame, CA USA             | H-1200-10                                           |                          |
| 9. Protein A/G-agarose beads                                                     | Santa Cruz Biotechnology, Texas, U.S.A      | sc-2003                                             |                          |
| 10. Fetal Bovine Serum (FBS)                                                     | Biowest                                     | #S181A                                              |                          |
| 11. 100 $\mu$ g/ml streptomycin and 100U/ml penicillin                           | Thermo Fisher Scientific                    | 15070063                                            |                          |
| 12. MCDB-105                                                                     | Sigma-Aldrich                               | M6395                                               |                          |
| 13. Medium-199                                                                   | Sigma-Aldrich                               | M4530                                               |                          |
| 14. DMEM/F12,<br>15. DMEM (4.5 g/l glucose),<br>16. RPMI-1640,<br>17. McCoy's 5A | Thermo Fisher Scientific                    | #11330032,<br>#11965118,<br>#11875093,<br>#16600082 |                          |
| 18. Ultrosor <sup>TM</sup> G serum substitute                                    | Pall Corporation                            | 15950-017                                           |                          |
| 19. Hu LRRC15 Recombinant Protein                                                | Sino Biological US Inc.                     | 15786-H02H                                          |                          |

Table S2

| Cell lines                                               | Media                         | Supplements                                        |
|----------------------------------------------------------|-------------------------------|----------------------------------------------------|
| OVCAR5/ OVCAR8/ PEO1/<br>PEO4/ OVCAR4/ OVCAR10/<br>OV202 | RPMI-1640                     | 10% FBS and 1% Pen/Strep                           |
| OVCAR7                                                   | DMEM (4.5 g/l glucose)        | 10% FBS, 1% Pen/Strep and insulin<br>(0.25U/ml)    |
| HeyA8MDR/ HeyA8/ Hey1/<br>COV362/ COV5044                | DMEM (4.5 g/l glucose)        | 10% FBS and 1% Pen/Strep                           |
| SKOV3 and derivatives                                    | McCoy's 5A                    | 10% FBS and 1% Pen/Strep                           |
| NOF151hTERT/TRS3/TOV21G                                  | MCDB-105: Medium-199<br>(1:1) | 10% FBS and 1% Pen/Strep                           |
| Mesothelial LP9/TERT-1 cells                             | DMEM/F12 (50:50)              | 10% FBS and 1% Pen/Strep and insulin<br>(0.25U/ml) |
| Patient-derived ascites                                  | DMEM/F12 (1:1)                | 15%FBS and 1% Pen/Strep                            |
| VOSE and IOSE523 cells                                   | MCDB-105: Medium-199<br>(1:1) | 10% FBS and 1% Pen/Strep                           |

Table S3: Patient details in TMA

| <b>sample</b> | <b>morph</b> | <b>stage</b> | <b>grade</b> | <b>sample</b> | <b>morph</b> | <b>stage</b> | <b>grade</b> | <b>sample</b> | <b>morph</b> | <b>stage</b> | <b>grade</b> |
|---------------|--------------|--------------|--------------|---------------|--------------|--------------|--------------|---------------|--------------|--------------|--------------|
| <b>1</b>      | cc           | 1C           | 3            | <b>22</b>     | cc           | 3C           | 3            | <b>43</b>     | cc           | 3C           | 3            |
| <b>2</b>      | cc           | 2C           | 3            | <b>23</b>     | cc           | 1A           | 3            | <b>44</b>     | cc           | 1C           | 3            |
| <b>3</b>      | cc           | 1C           | 3            | <b>24</b>     | ser          | 3C           | 4            | <b>45</b>     | cc           | 2C           | 2            |
| <b>4</b>      | cc           | 1            | 3            | <b>25</b>     | cc           | 1C           | 3            | <b>46</b>     | endo         | 3C           | 3            |
| <b>5</b>      | cc           | 1C           | 3            | <b>26</b>     | ser          | 4            | 4            | <b>47</b>     | cc           | 4            | 3            |
| <b>6</b>      | cc           | 1C           | 3            | <b>27</b>     | endo         | 3C           | 3            | <b>48</b>     | endo         | 2C           | 3            |
| <b>7</b>      | endo         | 1C           | 1            | <b>28</b>     | endo         | 3C           | 4            | <b>49</b>     | cc           | 3C           | 3            |
| <b>8</b>      | endo         | 3C           | 3            | <b>29</b>     | endo         | 1            | 1            | <b>50</b>     | cc           | 3C           | 3            |
| <b>9</b>      | cc           | 1C           | 3            | <b>30</b>     | endo         | 1B           | 3            | <b>51</b>     | endo         | 3C           | 4            |
| <b>10</b>     | cc           | 3C           | 3            | <b>31</b>     | endo         | 1A           | 3            | <b>52</b>     | endo         | 1B           | 2            |
| <b>11</b>     | cc           | 1A           | 3            | <b>32</b>     | cc           | 3B           | 3            | <b>53</b>     | cc           | 3C           | 4            |
| <b>12</b>     | cc           | 1B           | 3            | <b>33</b>     | endo         | 1A           | 4            | <b>54</b>     | endo         | 3C           | 2            |
| <b>13</b>     | endo         | 4            | 4            | <b>34</b>     | cc           | 1A           | 3            | <b>55</b>     | endo         | 1A           | 3            |
| <b>14</b>     | endo         | 3C           | 3            | <b>35</b>     | cc           | 3C           | 4            | <b>56</b>     | endo         | 3C           | 2            |
| <b>15</b>     | ser          | 3C           | 4            | <b>36</b>     | endo         | 1C           | 1            | <b>57</b>     | endo         | 3C           | 2            |
| <b>16</b>     | endo         | 1            | 1            | <b>37</b>     | ser          | 3C           | 4            | <b>58</b>     | endo         | 3C           | 3            |
| <b>17</b>     | cc           | 3C           | 3            | <b>38</b>     | cc           | 4            | 2            | <b>59</b>     | cc           | 1C           | 3            |
| <b>18</b>     | endo         | 3B           | 2            | <b>39</b>     | cc           | 3C           | 4            | <b>60</b>     | endo         | 1C           | 2            |
| <b>19</b>     | ser          | 3C           | 4            | <b>40</b>     | ser          | 4            | 4            | <b>61</b>     | endo         | 3C           | 3            |
| <b>20</b>     | endo         | 1A           | 2            | <b>41</b>     | ser          | 3C           | 4            | <b>62</b>     | endo         | 1C           | 2            |
| <b>21</b>     | endo         | 1A           | 1            | <b>42</b>     | ser          | 3C           | 3            | <b>63</b>     | endo         | 4            | 3            |

Table S4: Human ascites samples

| <b>Pt ID</b> | <b>Diagnosis</b>           | <b>Stage</b> | <b>Grade</b> | <b>Clinical Information</b>      |
|--------------|----------------------------|--------------|--------------|----------------------------------|
| JM067        | High Grade Serous          | IIIC         | 3            | Malignant (Fallopian Tube)       |
| AM812        | High Grade Serous          | IIIC         | 3            | Malignant (Epithelial)           |
| DC738        | High Grade Serous          | IIIC         | 3            | Malignant (Primary Peritoneal)   |
| KP263        | High Grade Serous          | IIIC         | 3            | Malignant (Epithelial)           |
| A3626        | Serous papillary carcinoma | IIIC         | 2            | Patient recurred after 11 months |
| A4832        | High Grade Serous          | late         | 1            | Primary Peritoneal               |
| A7683        | High Grade Serous          | late         | 3            | Primary Peritoneal               |
| DLD          | High Grade Serous          | IIIC         | -            | -                                |

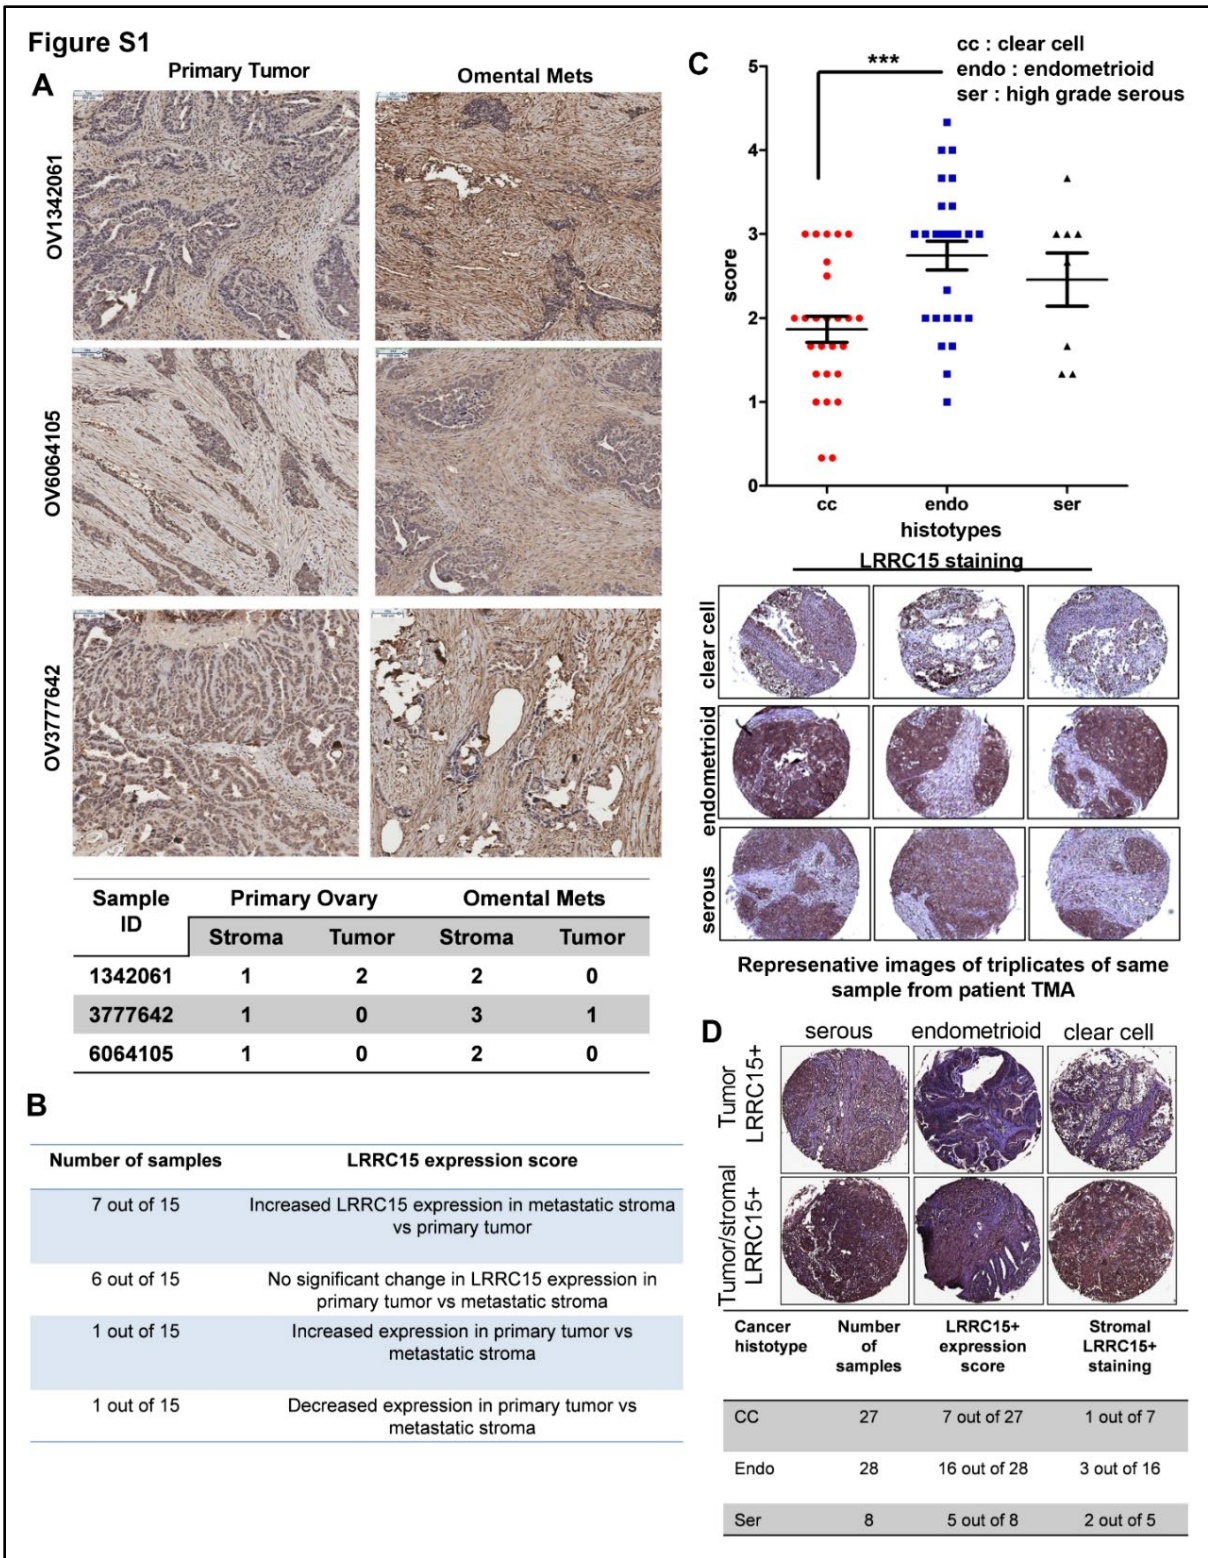

**Figure S1: High expression of LRRC15 is associated with adverse outcome.** (A) Representative IHC analysis of LRRC15 expression in ovarian primary tumors and omental mets in autologous patients were provided. Scale bars 100µm. IHC scores in the PTs and their paired omental mets were represented beneath the image. (B) A cumulative analysis of total number of PTs vs their matched omental mets sample scored for

LRRC15 expression was provided. (C) LRRC15 expression was analyzed in the patient TMA containing 3 different OC histotype (in triplicates for each patient) and plotted. Representative images for the LRRC15 staining in the TMA was provided. (D) LRRC15 expression was scored in stromal and tumor compartments in the TMA and represented.

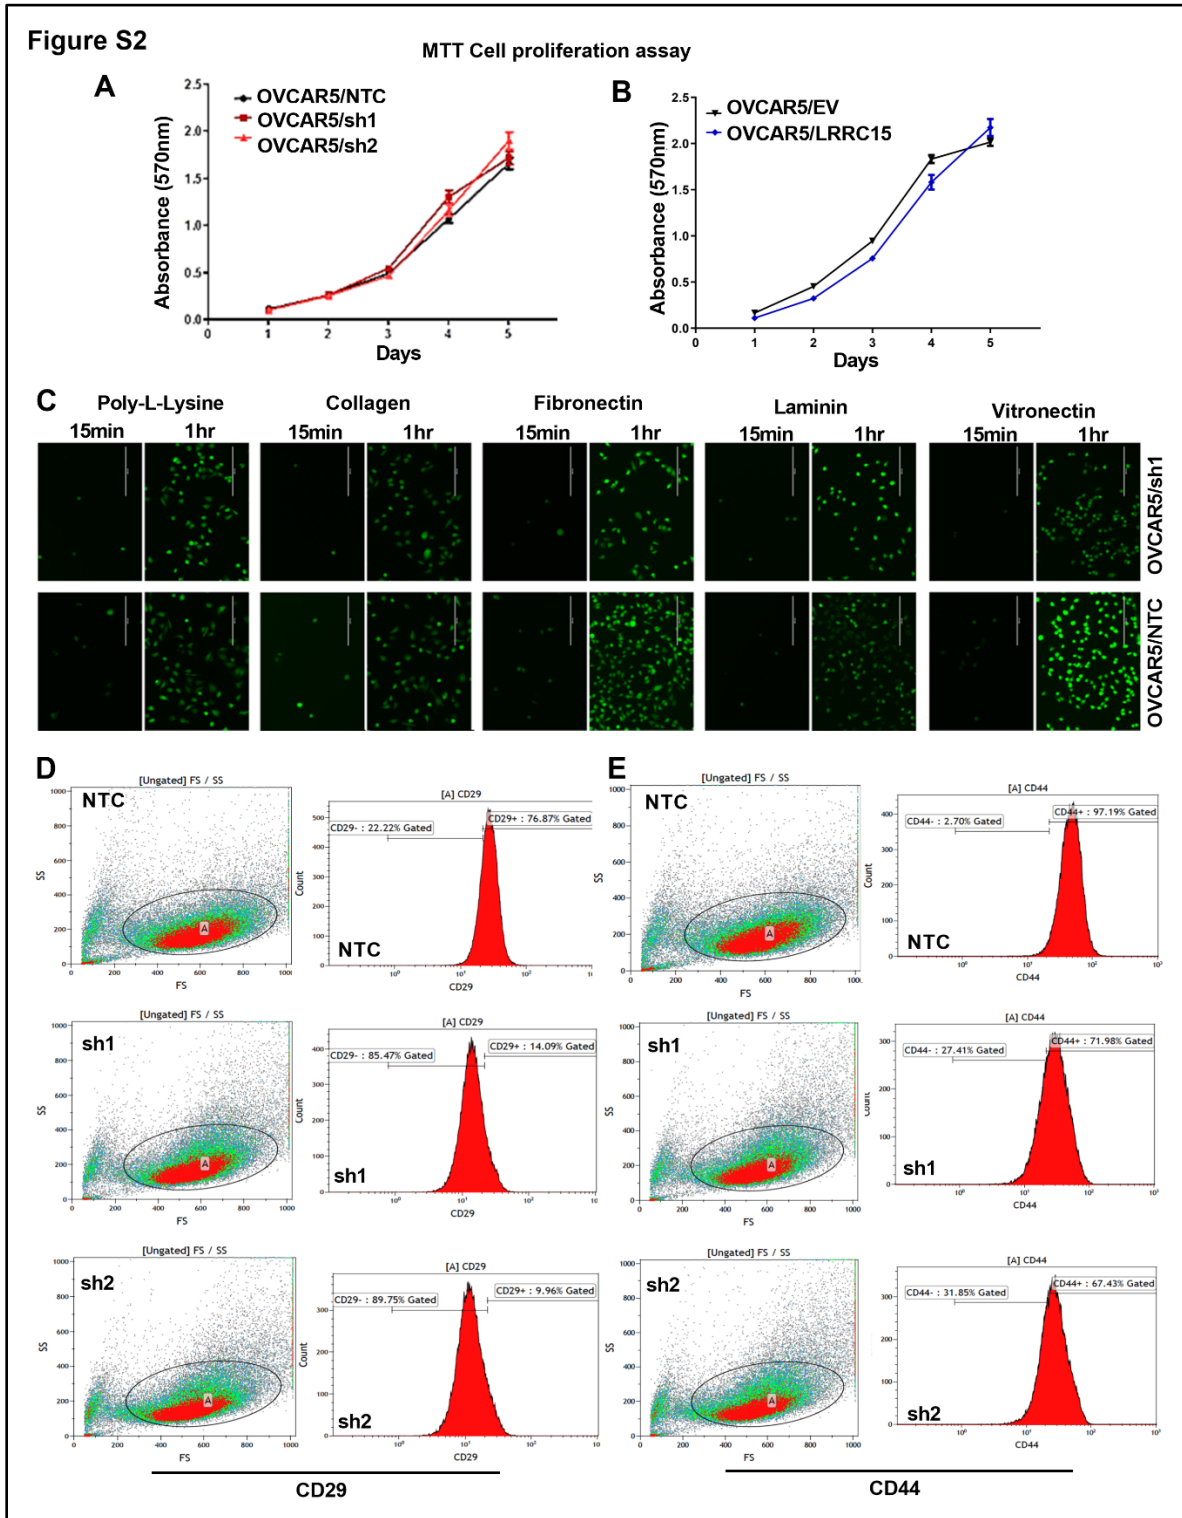

**Figure S2: LRRC15 expression leads to increased adhesion.** (A-B) Cell proliferation assay using MTT was performed and was compared between OVCAR5 NTC and sh1/sh2 LRRC15 KD cells and between OVCAR7 EV and LRRC15 cells. (C) Representative images of CMFDA labeled NTC and sh1 OVCAR5 cells on seeded to the top of the culture dishes that were pre-coated with poly-l-lysine, collagen, fibronectin, laminin and vitronectin respectively was provided after 15mins and 1hr respectively. (D) Gating strategy for the expression analysis of CD29 and (E) CD44 was represented in OVCAR5 NTC control and sh1/sh2 cells.

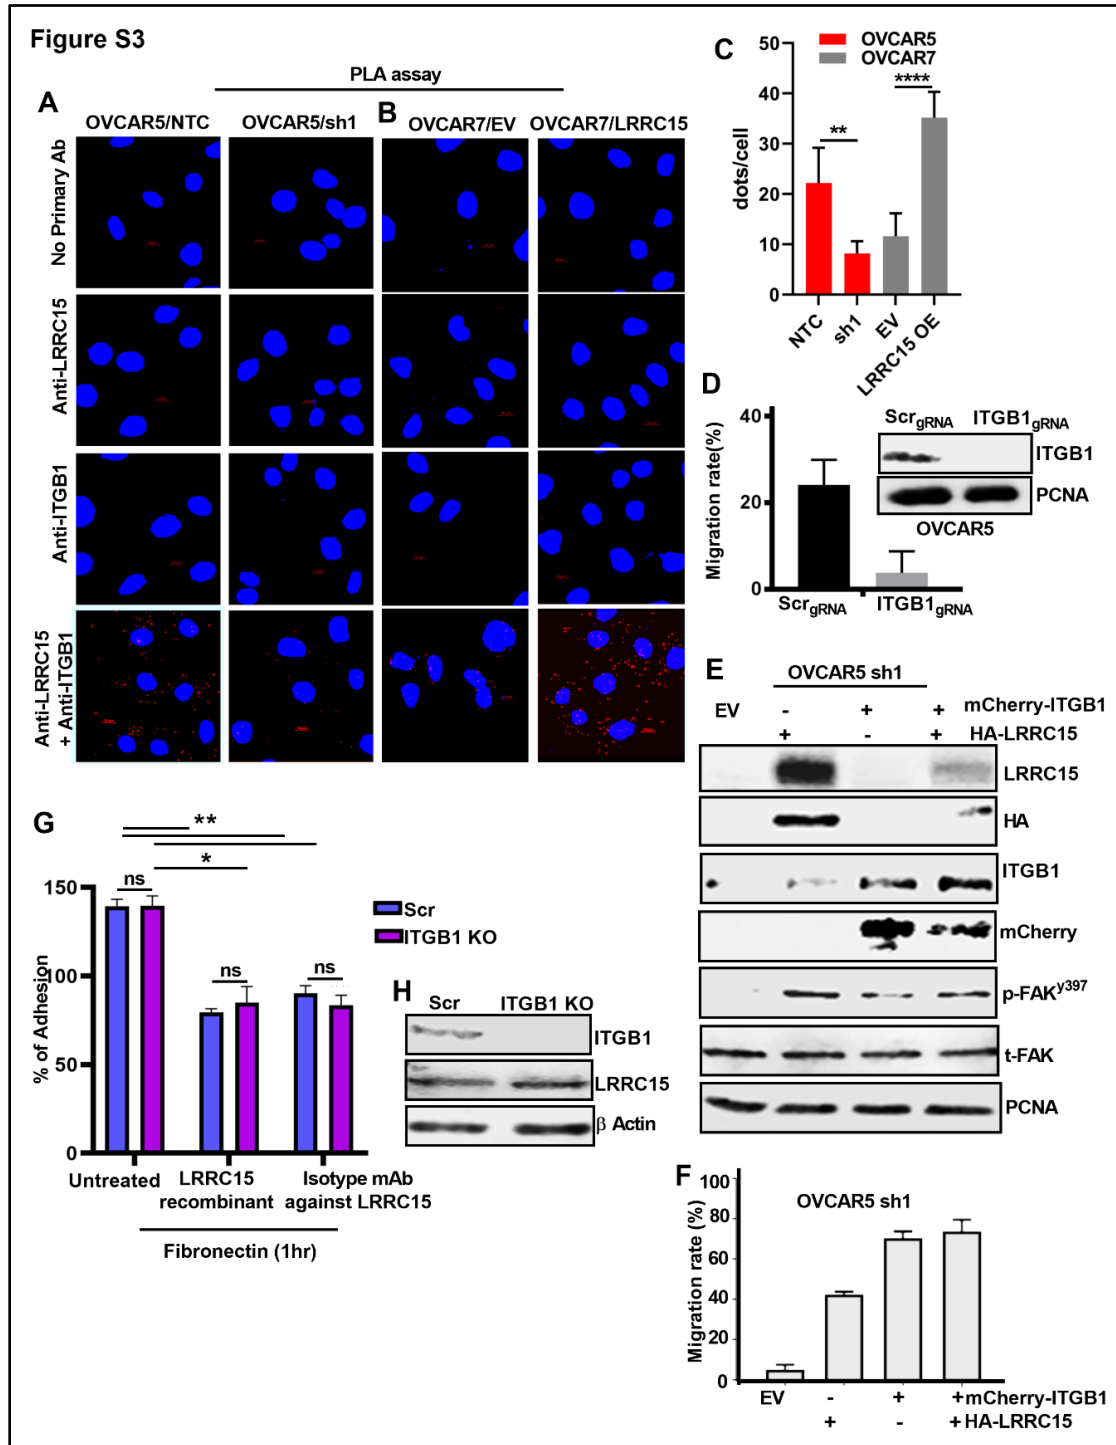

**Figure S3: LRRC15-β1 integrin interaction activates FAK signaling and increased migration in OC cells.**

(A) Proximity ligation assay was performed to score the interaction between ITGB1 and LRRC15 in OVCAR5 NTC and sh1 cells and (B) in OVCAR7 EV and LRRC15 overexpressed cells and representative images were provided. Scale bar 10μm. (C) Red signal dots denoting positive interaction was quantified and the data was provided as dots/cells and mean ± SEM was plotted for each group (\*\*\*\*p<0.0001, \*\*p<0.01). (D) ITGB1 knock out (KO) OVCAR5 cells were generated using CRISPR/Cas9-based approach. Efficient KO was confirmed by western blot. PCNA used as loading control. Scratch wound healing assay was performed in the mentioned cells for 24hrs. Percent cell migration was plotted. (E) OVCAR5 sh1 LRRC15 KD cells were transfected with HA-tagged LRRC15 and mcherry-tagged ITGB1 individually or in combination followed by immunoblot analysis. The p-FAK<sup>y397</sup> and total FAK levels were analyzed. PCNA used as loading control. (F) Under similar condition, wound healing assay was performed with the mentioned transfected cells for 24hrs. Percent cell migration was plotted. (G) Percent cell adhesion was calculated and plotted for the CMFDA labelled scrambled control and ITGB1 KO OVCAR5 cells that still retain LRRC15 expression on FN coated plates before and after pre-blocking the FN binding sites with recombinant LRRC15 protein and M25 monoclonal antibody that is a strong binder of LRRC15. (H) Western blot analysis showing the expression of LRRC15 and ITGB1 in the scrambled control and ITGB1 KO cells.

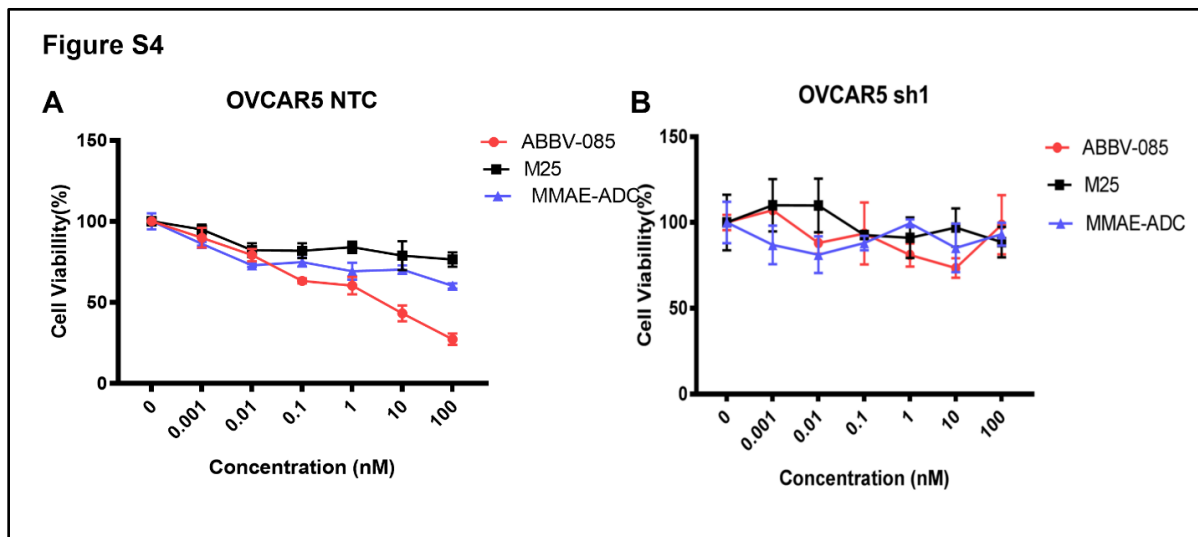

**Figure S4: ABBV-085 inhibits cell viability in the OVCAR5 cells.** (A) Percent cell viability was analyzed in the OVCAR5 NTC and the (B) sh1 LRRC15 KD cells upon treatment with ABBV-085 and the two controls in a dose dependent manner for 24hrs.



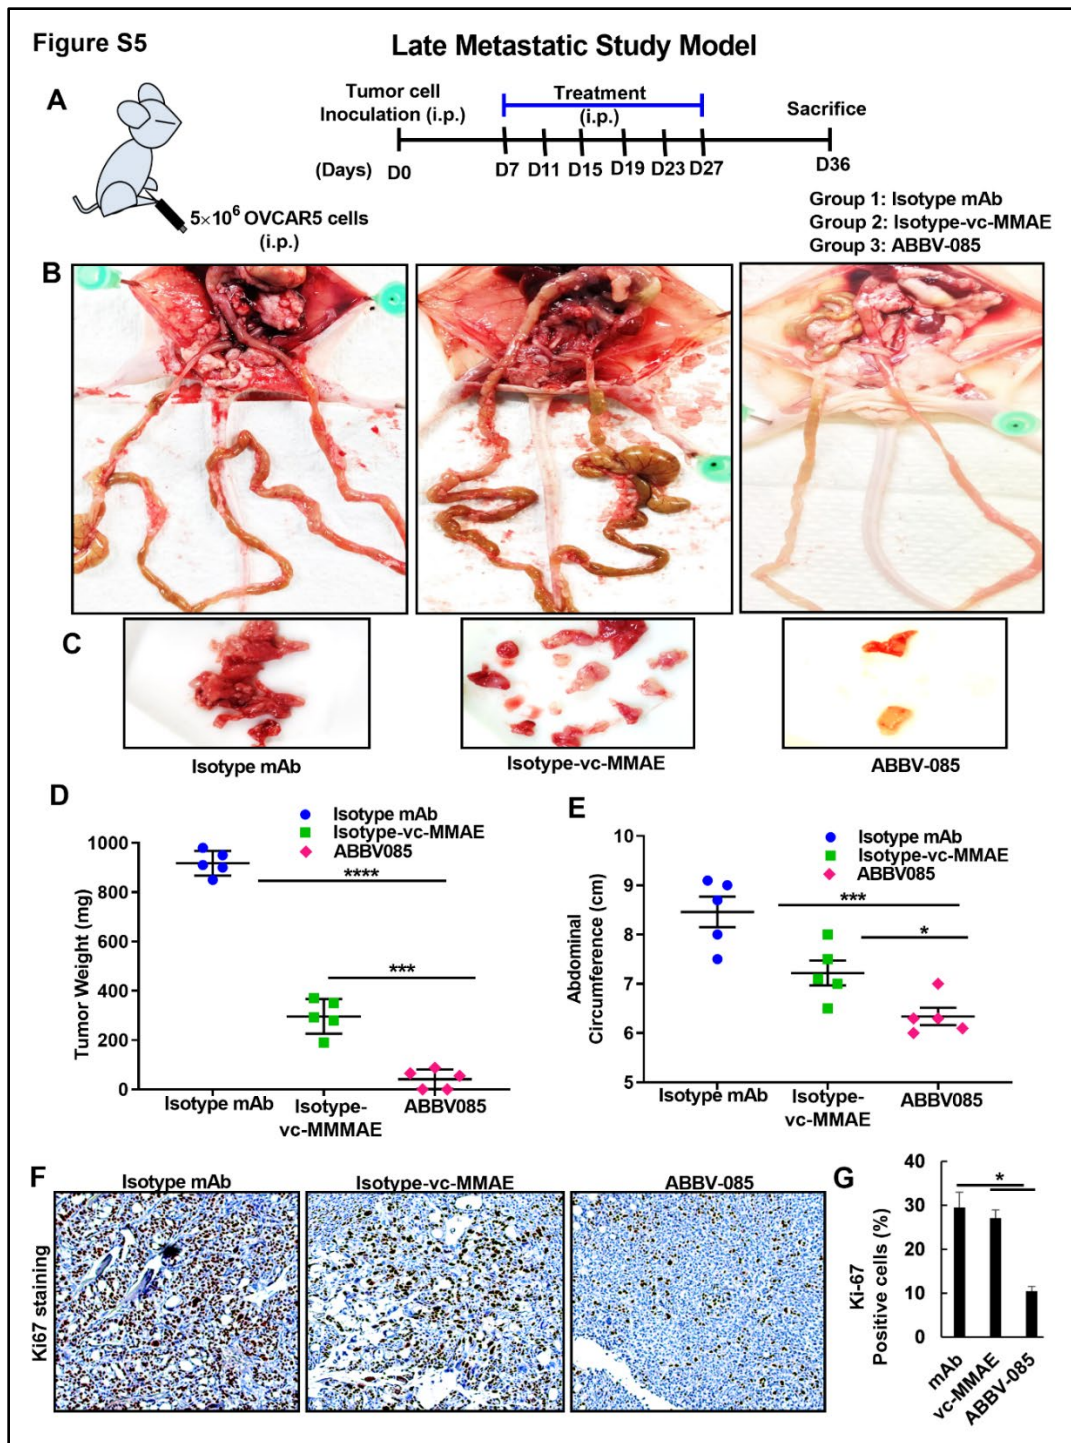

**Figure S5: ABBV-085 inhibits tumor growth in late metastatic model of OVCAR5 xenografts.** (A) Schematic representation of the late metastatic study model in mice OC xenograft was provided. (B) Randomized OVCAR5 tumor-bearing mice were treated as mentioned for 4 weeks and euthanized at day 36. Illustrative images of the mice with the tumor burden and metastatic nodes were shown. (C) Representative images for the tumor burden per mice for the 3 treatment groups were provided. (D) Graphical representation of the excised tumor weights in the 3 treatment cohorts (\*\*\*\* $p < 0.0001$ , \*\*\* $p < 0.001$ ). (E) Abdominal

circumference of each animal measured on the day 36 across the treatment groups (\* $p < 0.05$ , \*\*\* $p < 0.001$ ). (F-G) Ki67 staining in each of the treated group was performed and quantified.

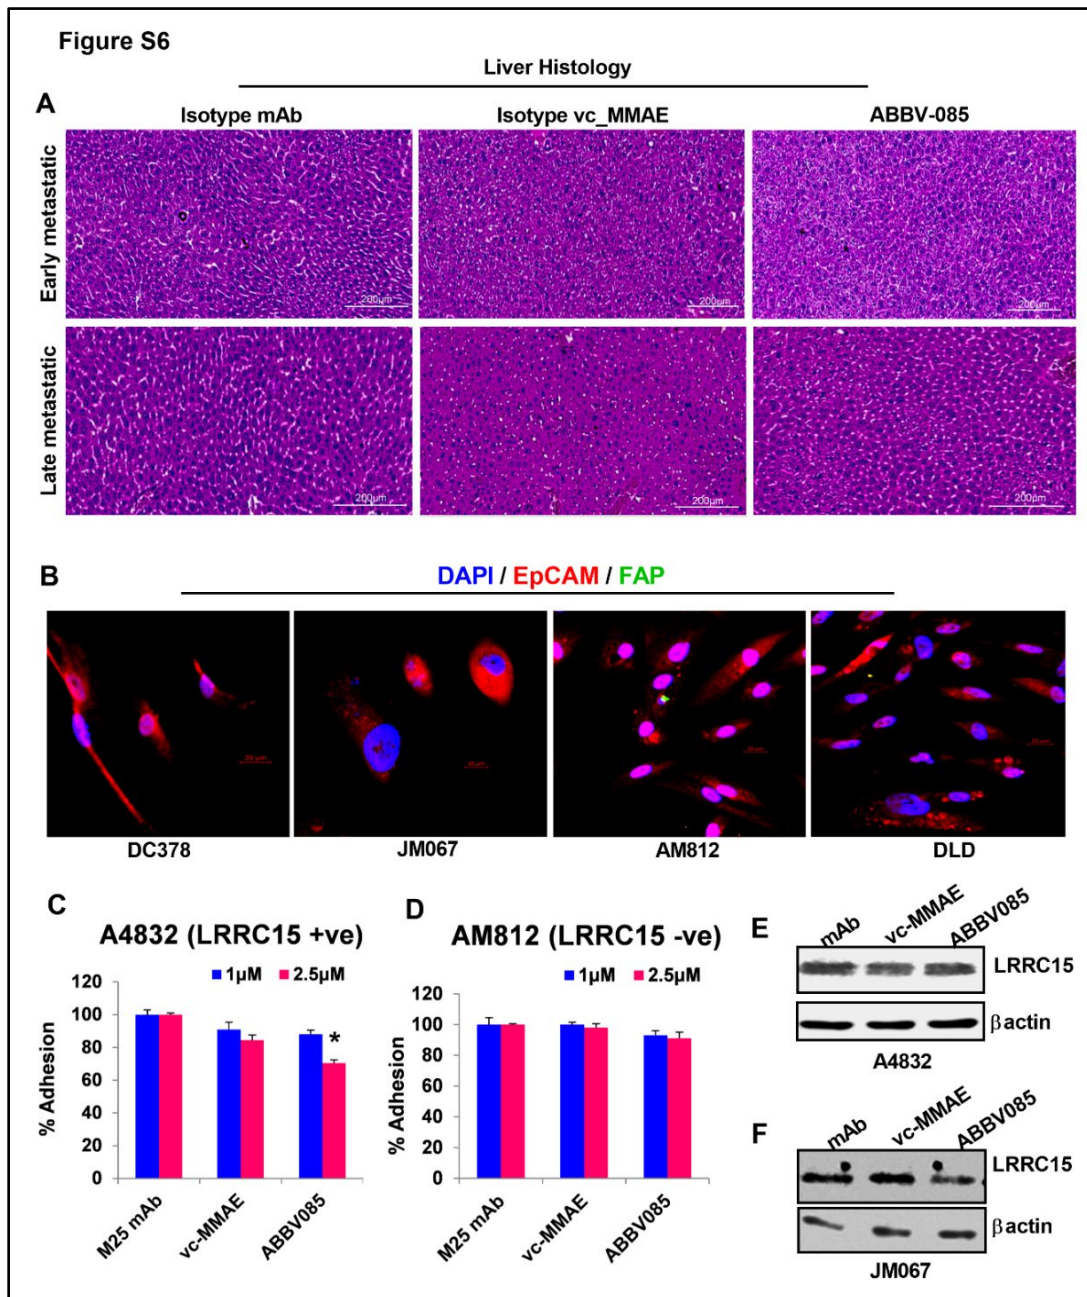

**Figure S6: Treatment with ABBV-085 reduces adhesion in LRRC15-expressing human patient-derived ascites.** (A) H&E staining showing the liver histology in early and late metastatic model of OVCAR5 xenograft was shown in the ABBV-085 treated and drug control groups. (B) Confocal imaging by IF study against the human epithelial specific marker EpCAM (red) and fibroblast specific marker FAP (green) was performed in the patient-derived ascites cells and represented. DAPI was used to stain nucleus. Scale: 20µm. (C) LRRC15

expressing A4832 cells were pre-labeled with CMFDA and then seeded onto the top of the culture dishes that were pre-coated with fibronectin. Percent adhered cells were represented as mean  $\pm$  SEM (\* $p < 0.05$ ). (D) Similar assay was performed with the LRRC15 non-expressing AM812 cells and the percent adhered cells were represented. (E-F) Immunoblot analysis of LRRC15 expression in the A4832 and JM067 ascites cells were performed upon treatment with ABBV-085 and drug controls and presented.  $\beta$  actin was used as loading control.

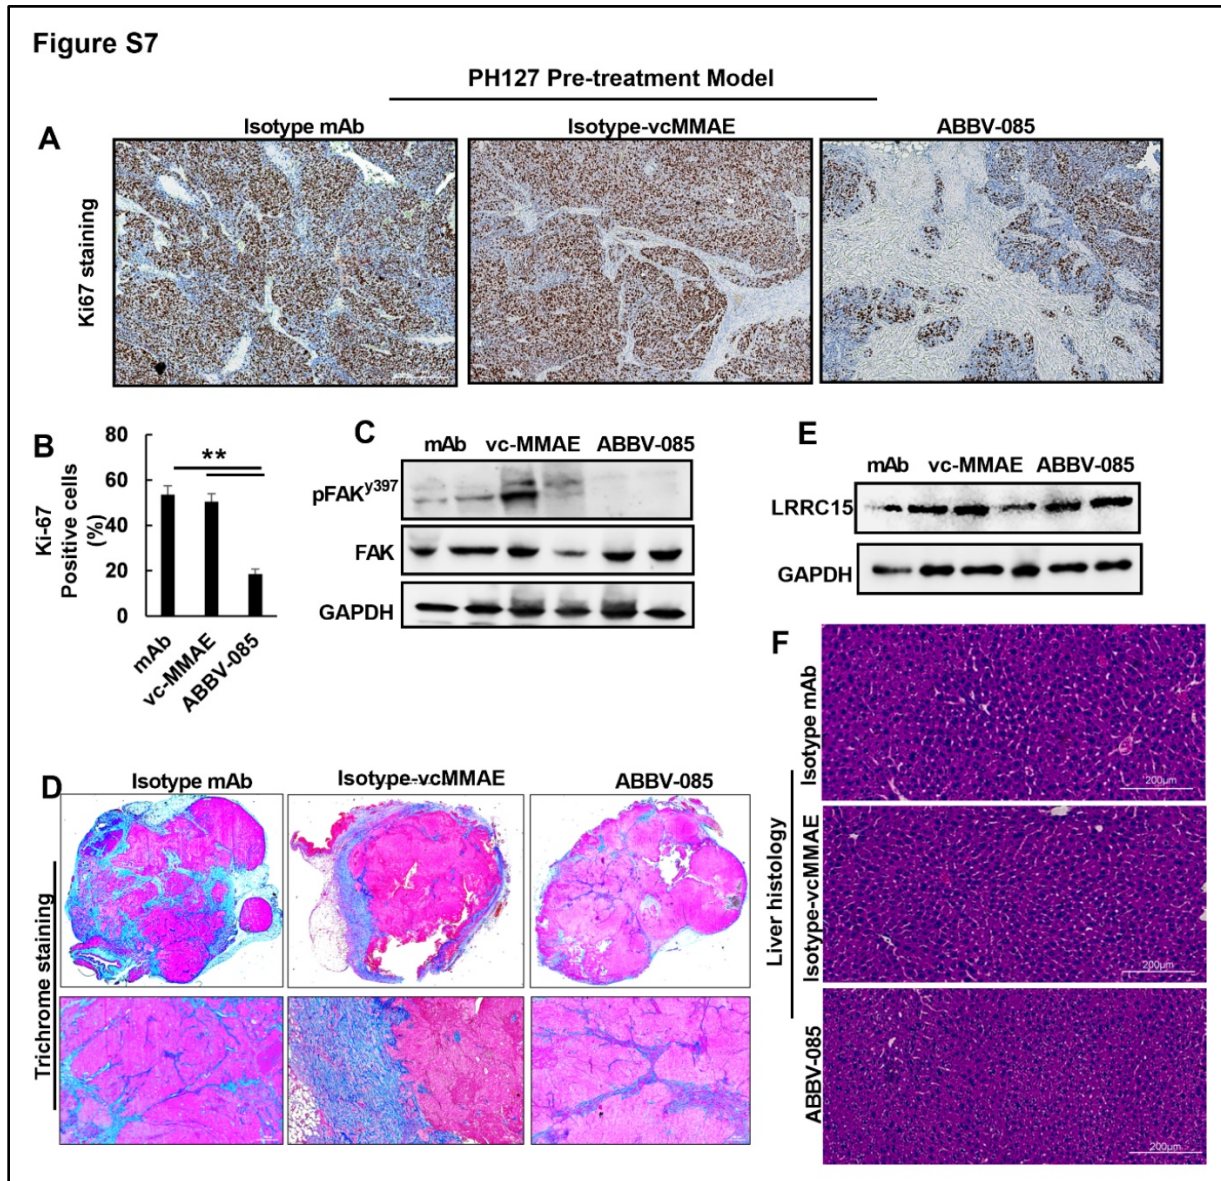

**Figure S7: ABBV-085 therapeutic efficacy in the PH127 PDX xenograft.** (A) Immunostaining showing Ki67 levels in the PH127 early metastatic model tumor sections from mice treated with ABBV-085, mAb control and Isotype-vc-MMAE-E2 drug control. (B) Quantification of Ki67 positive cells was provided

(\*\*p<0.01). (C) Immunoblot analysis of pFAK<sup>y397</sup> and FAK in the xenograft tumors. GAPDH is used as endogenous control. (D) Masson's trichrome staining for ECM infiltration assessment was performed in the xenograft tumors. (E) Western blot analysis for LRRC15 was performed in the xenograft tumors with GAPDH as control. (F) H&E staining showing the liver histology in PH127 PDX xenograft was shown in the ABBV-085 treated and drug control groups.

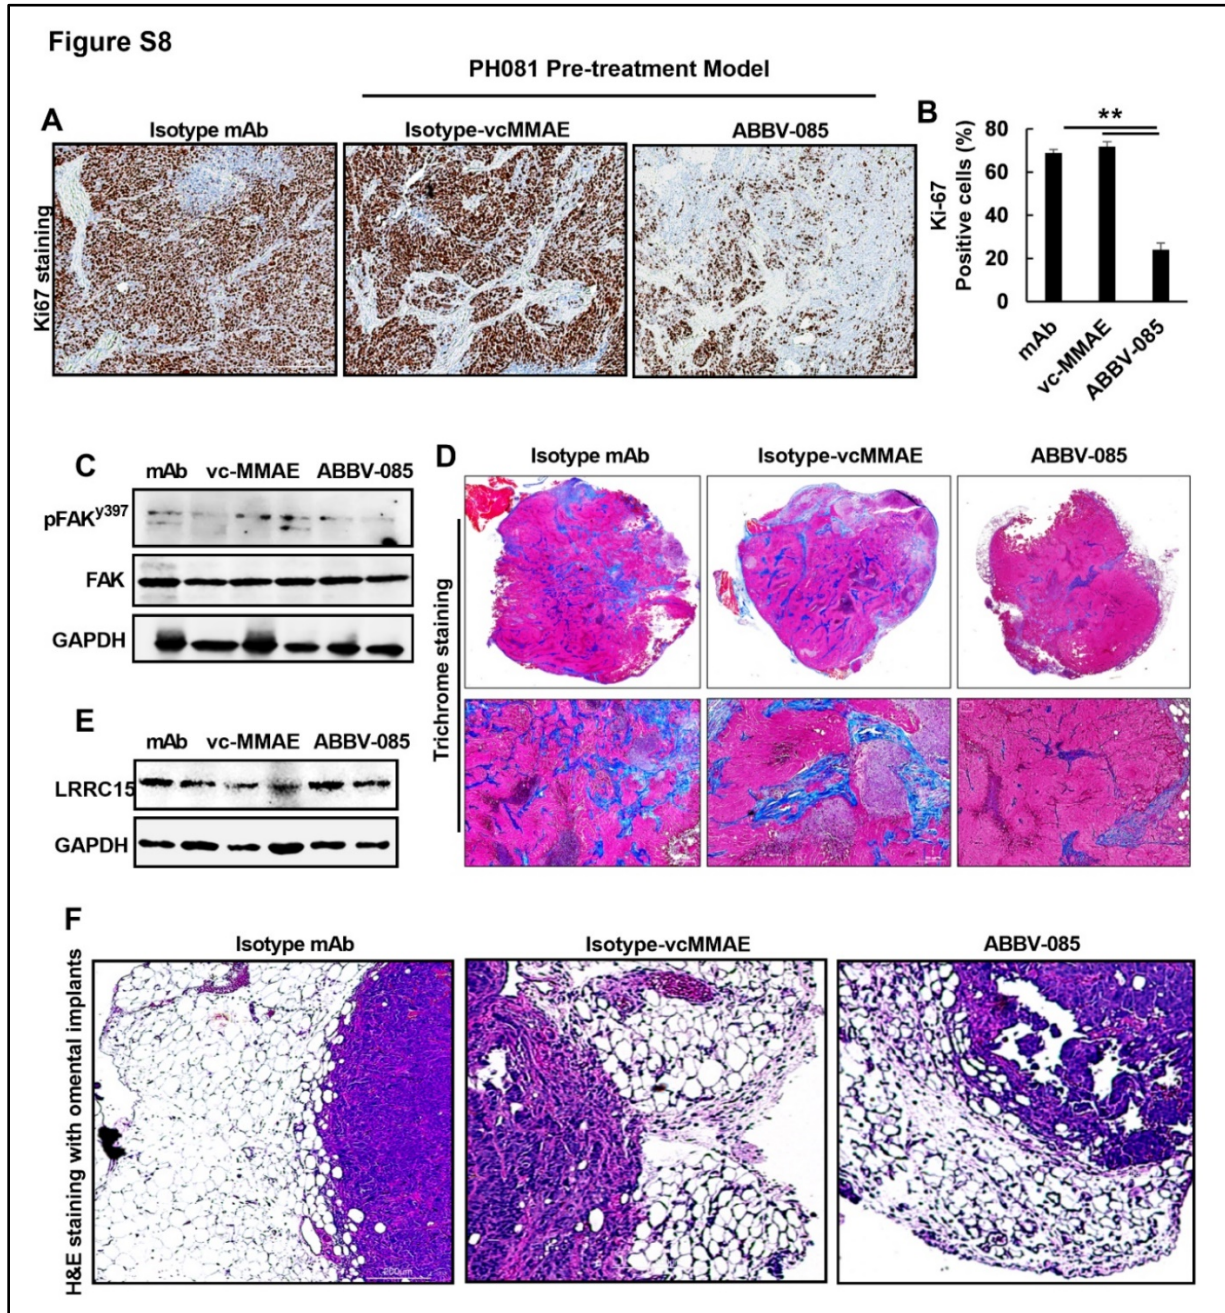

**Figure S8: ABBV-085 therapeutic efficacy in the PH081 PDX xenograft.** (A-B) Immunostaining showing Ki67 levels and quantification in the PH081 early metastatic model tumor sections from the treated groups. (C) Immunoblot analysis of p-FAK<sup>y397</sup> and total FAK in the xenograft tumors. GAPDH is used as endogenous control. (D) Masson's trichrome staining was performed in the xenograft tumors. (E) Western blot analysis for LRRC15 was performed in the xenograft tumors. (F) H&E staining to show the cells in the omental implants were performed in PH081 xenograft treated and control tumor sections.
